# Supplementary material
Source: MDPI journal article supplement (https://www.mdpi.com/2071-1050/15/17/12900)
Supplement: s1 [file s1]

Title: Elucidating the effect of Biochar-bentonite composite-based Seed balls for the Remediation of coal mining impacted Heavy metals contaminated Soil

Supplementary Material

Figures:

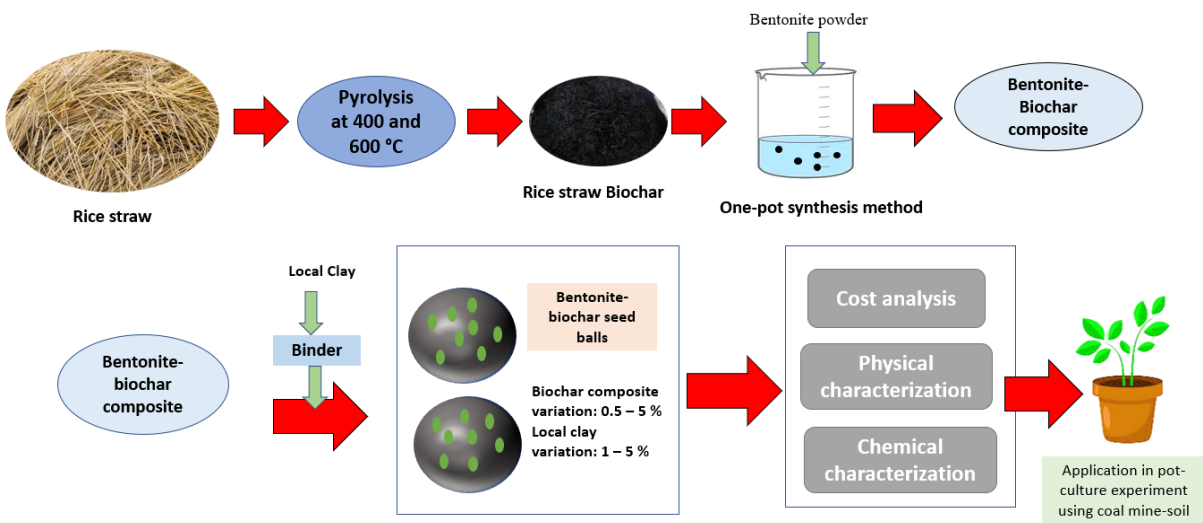

Figure S1. Methodology for the development of seed balls from rice-straw waste derived bentonite biochar composite and kaolinite to be implemented in the pot-culture study.

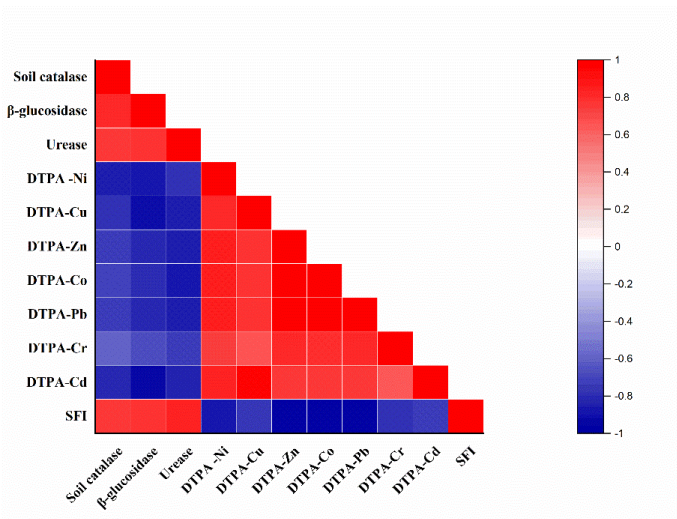

Figure S2. Correlation matrix among soil enzymes, DTPA-extractable heavy metals, and SFI.

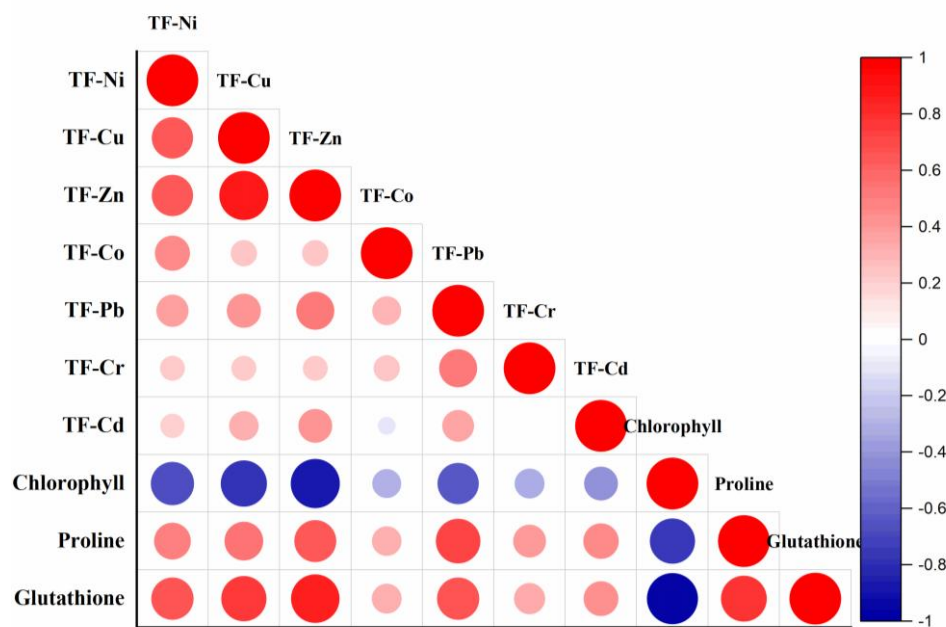

**Figure S3.** Correlation diagram among total chlorophyll, proline, glutathione, and translocation factor of heavy metals.

#### Soil Texture Analysis

Sand: 52 %  
Silt: 40 %  
Clay: 8 %

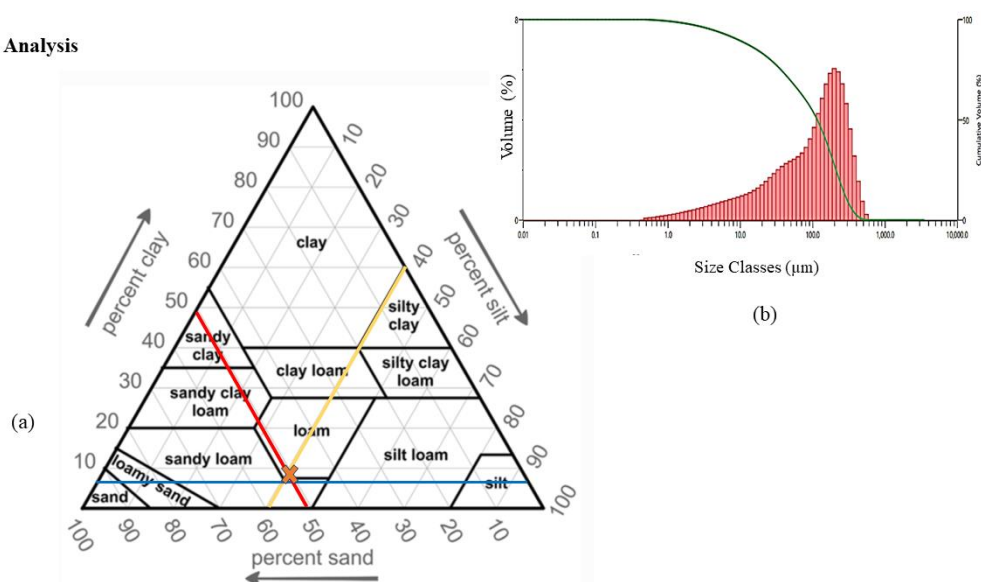

**Figure S4.** Soil granulometry and texture analysis.

## Tables

**Table S1.** Physicochemical characteristics of the kaolinite clay.

| Parameters                                              | Values |
|---------------------------------------------------------|--------|
| pH                                                      | 7.78   |
| Cation exchange capacity (CEC) (cmol kg <sup>-1</sup> ) | 13.89  |
| Zn (mg kg <sup>-1</sup> )                               | 47.85  |
| SSA (m <sup>2</sup> g <sup>-1</sup> )                   | 28     |
| Organic Matter %                                        | 0.89   |
| Exchangeable Mg (mg kg <sup>-1</sup> )                  | 38.39  |
| Exchangeable K mg kg <sup>-1</sup> )                    | 59.68  |
| Exchangeable Ca (mg kg <sup>-1</sup> )                  | 118.42 |
| Available P (mg kg <sup>-1</sup> )                      | 6.89   |

**Table S2.** Physicochemical characteristics of bentonite-biochar composite.

| Parameter                                          | Values |
|----------------------------------------------------|--------|
| Carbon (%)                                         | 41.67  |
| Hydrogen (%)                                       | 2.12   |
| Nitrogen (%)                                       | 2.16   |
| Oxygen (%)                                         | 17.87  |
| Volatile Matter (%)                                | 47.58  |
| Fixed Carbon (%)                                   | 11.48  |
| Mineral Matter (%)                                 | 32.12  |
| BET Surface area (m <sup>2</sup> g <sup>-1</sup> ) | 126.87 |
| pH                                                 | 8.50   |
| CEC (cmol kg <sup>-1</sup> )                       | 56.46  |
| Exchangeable K (g kg <sup>-1</sup> )               | 7.62   |
| Exchangeable Ca (g kg <sup>-1</sup> )              | 3.18   |
| Exchangeable Mg (mg kg <sup>-1</sup> )             | 213.60 |
| Exchangeable Na (mg kg <sup>-1</sup> )             | 344.20 |

**Table S3.** Physicochemical characteristics of the seeds balls developed through the combination of biochar-bentonite composite and kaolinite.

| Items  | pH   | Exchangeable-K (mg<br>kg <sup>-1</sup> ) | Exchangeable-Ca (mg<br>kg <sup>-1</sup> ) | Exchangeable-Mg<br>(mg kg <sup>-1</sup> ) | Available P (mg<br>kg <sup>-1</sup> ) | Organic<br>carbon % | CEC (cmol kg <sup>-1</sup> ) |
|--------|------|------------------------------------------|-------------------------------------------|-------------------------------------------|---------------------------------------|---------------------|------------------------------|
| 0.5B1C | 7.29 | 83.46                                    | 91.53                                     | 30.27                                     | 7.83                                  | 1.53                | 14.66                        |
| 1B1C   | 7.68 | 90.28                                    | 97.26                                     | 35.56                                     | 9.29                                  | 1.89                | 16.43                        |
| 3B1C   | 8.24 | 98.44                                    | 107.39                                    | 37.44                                     | 10.35                                 | 2.34                | 18.29                        |
| 5B1CB  | 8.76 | 108.21                                   | 118.24                                    | 40.21                                     | 12.36                                 | 2.68                | 23.22                        |
| 0.5B3C | 7.69 | 94.76                                    | 102.38                                    | 33.47                                     | 8.31                                  | 1.77                | 17.24                        |
| 1B3C   | 8.13 | 104.33                                   | 114.76                                    | 36.51                                     | 9.58                                  | 2.31                | 19.43                        |
| 3B3C   | 8.42 | 110.81                                   | 122.39                                    | 41.39                                     | 11.32                                 | 2.42                | 24.73                        |
| 5B3C   | 8.89 | 123.21                                   | 129.72                                    | 44.57                                     | 13.46                                 | 2.83                | 26.89                        |
| 0.5B5C | 8.06 | 98.77                                    | 108.63                                    | 37.82                                     | 10.11                                 | 2.04                | 18.33                        |
| 1B5C   | 8.42 | 109.43                                   | 116.29                                    | 43.72                                     | 14.26                                 | 2.38                | 22.32                        |
| 3B5C   | 8.84 | 118.37                                   | 124.78                                    | 48.24                                     | 17.29                                 | 2.56                | 24.47                        |
| 5B5C   | 9.07 | 128.38                                   | 133.43                                    | 54.39                                     | 19.88                                 | 2.88                | 26.44                        |

**Table S4.** Post-pot-culture concentrations and variations of total heavy metals content in the amended soil (n = 3, mean  $\pm$  S.D.).

| Ni                     | Cu                     | Zn                     | Co                     | Pb                     | Cr                     | Cd                     |
|------------------------|------------------------|------------------------|------------------------|------------------------|------------------------|------------------------|
| (mg kg <sup>-1</sup> ) |
| 40.29 $\pm$ 4.71       | 17.24 $\pm$ 0.59       | 56.24 $\pm$ 1.81       | 19.32 $\pm$ 0.79       | 21.49 $\pm$ 0.61       | 124.38 $\pm$ 3.55      | 1.02 $\pm$ 0.026       |
| 38.23 $\pm$ 1.37       | 16.43 $\pm$ 0.67       | 52.35 $\pm$ 1.28       | 16.44 $\pm$ 0.41       | 18.76 $\pm$ 0.66       | 120.66 $\pm$ 4.16      | 0.96 $\pm$ 0.018       |
| 35.14 $\pm$ 1.35       | 13.2 $\pm$ 0.37        | 46.33 $\pm$ 1.33       | 13.86 $\pm$ 0.53       | 16.28 $\pm$ 0.70       | 115.29 $\pm$ 3.21      | 0.93 $\pm$ 0.029       |
| 33.19 $\pm$ 1.37       | 11.16 $\pm$ 0.48       | 41.57 $\pm$ 1.29       | 11.29 $\pm$ 0.35       | 13.14 $\pm$ 0.51       | 111.32 $\pm$ 3.98      | 0.88 $\pm$ 0.022       |
| 36.47 $\pm$ 1.33       | 16.12 $\pm$ 0.54       | 52.16 $\pm$ 1.18       | 17.48 $\pm$ 0.63       | 17.26 $\pm$ 0.66       | 121.39 $\pm$ 3.53      | 0.95 $\pm$ 0.026       |
| 32.26 $\pm$ 0.83       | 13.25 $\pm$ 0.36       | 47.38 $\pm$ 1.63       | 14.54 $\pm$ 0.47       | 15.44 $\pm$ 0.50       | 116.44 $\pm$ 2.46      | 0.89 $\pm$ 0.024       |
| 27.45 $\pm$ 0.72       | 11.69 $\pm$ 0.43       | 42.64 $\pm$ 1.10       | 10.19 $\pm$ 0.38       | 11.16 $\pm$ 0.31       | 111.28 $\pm$ 2.20      | 0.82 $\pm$ 0.015       |
| 21.38 $\pm$ 0.67       | 8.67 $\pm$ 0.21        | 37.31 $\pm$ 1.24       | 8.76 $\pm$ 0.24        | 8.35 $\pm$ 0.24        | 106.73 $\pm$ 1.91      | 0.74 $\pm$ 0.013       |
| 33.28 $\pm$ 1.31       | 14.24 $\pm$ 0.52       | 49.36 $\pm$ 1.33       | 15.44 $\pm$ 0.33       | 14.48 $\pm$ 0.46       | 116.81 $\pm$ 2.47      | 0.87 $\pm$ 0.018       |
| 28.64 $\pm$ 1.10       | 11.23 $\pm$ 0.35       | 43.38 $\pm$ 1.59       | 11.38 $\pm$ 0.30       | 10.33 $\pm$ 0.39       | 111.39 $\pm$ 2.30      | 0.81 $\pm$ 0.19        |
| 23.19 $\pm$ 0.72       | 7.64 $\pm$ 0.24        | 38.44 $\pm$ 1.26       | 7.28 $\pm$ 0.23        | 7.14 $\pm$ 0.21        | 105.24 $\pm$ 1.98      | 0.74 $\pm$ 0.017       |
| 20.33 $\pm$ 0.67       | 5.22 $\pm$ 0.14        | 32.17 $\pm$ 0.84       | 5.26 $\pm$ 0.14        | 4.22 $\pm$ 0.16        | 99.77 $\pm$ 1.79       | 0.66 $\pm$ 0.019       |
| 49.97 $\pm$ 1.93       | 20.3 $\pm$ 0.79        | 62.19 $\pm$ 2.40       | 22.11 $\pm$ 0.86       | 24.82 $\pm$ 0.82       | 133.82 $\pm$ 3.82      | 1.14 $\pm$ 0.033       |

**Table S5.** Heavy metals in shoot and root parts of the Shorgham grass.

| Samples | Ni <sup>shoot</sup>    | Cu <sup>shoot</sup>    | Zn <sup>shoot</sup>    | Co <sup>shoot</sup>    | Pb <sup>shoot</sup>    | Cr <sup>shoot</sup>    | Cd <sup>shoot</sup>    |
|---------|------------------------|------------------------|------------------------|------------------------|------------------------|------------------------|------------------------|
|         | (mg kg <sup>-1</sup> ) |
| 0.5B1C  | 2.04                   | 2.31                   | 5.24                   | 1.68                   | 2.14                   | 7.21                   | 0.096                  |
| 1B1C    | 1.9                    | 2.15                   | 4.89                   | 1.53                   | 1.83                   | 6.42                   | 0.083                  |
| 3B1C    | 1.72                   | 1.89                   | 4.67                   | 1.32                   | 1.61                   | 4.76                   | 0.065                  |
| 5B1CB   | 1.55                   | 1.64                   | 4.33                   | 1.12                   | 1.36                   | 3.21                   | 0.044                  |
| 0.5B3C  | 1.91                   | 2.03                   | 4.91                   | 1.52                   | 1.96                   | 6.44                   | 0.078                  |
| 1B3C    | 1.68                   | 1.77                   | 4.62                   | 1.28                   | 1.64                   | 4.89                   | 0.061                  |
| 3B3C    | 1.51                   | 1.52                   | 4.18                   | 1.1                    | 1.32                   | 3.26                   | 0.042                  |
| 5B3C    | 1.24                   | 1.28                   | 3.91                   | 0.84                   | 1.06                   | 2.54                   | 0.03                   |
| 0.5B5C  | 1.16                   | 1.71                   | 4.43                   | 1.21                   | 1.52                   | 4.38                   | 0.063                  |
| 1B5C    | 1.21                   | 1.33                   | 3.95                   | 0.94                   | 1.19                   | 3.17                   | 0.036                  |
| 3B5C    | 0.94                   | 1.12                   | 3.45                   | 0.62                   | 0.85                   | 2.34                   | 0.024                  |

| 5B5C                          | 0.76                        | 0.82                        | 2.92                        | 0.48                        | 0.54                        | 1.59                        | 0.016                       |
|-------------------------------|-----------------------------|-----------------------------|-----------------------------|-----------------------------|-----------------------------|-----------------------------|-----------------------------|
| Control                       | 3.97                        | 3.26                        | 7.43                        | 2.2                         | 2.76                        | 10.28                       | 0.15                        |
| Heavy metals in the Root part |                             |                             |                             |                             |                             |                             |                             |
|                               | <b>Ni<sub>root</sub></b>    | <b>Cu<sub>root</sub></b>    | <b>Zn<sub>root</sub></b>    | <b>Co<sub>root</sub></b>    | <b>Pb<sub>root</sub></b>    | <b>Cr<sub>root</sub></b>    | <b>Cd<sub>root</sub></b>    |
|                               | <b>(mg kg<sup>-1</sup>)</b> |
| 0.5B1C                        | 2.88                        | 2.59                        | 6.11                        | 2.06                        | 2.44                        | 11.43                       | 0.126                       |
| 1B1C                          | 2.61                        | 2.29                        | 5.73                        | 1.73                        | 2.17                        | 9.77                        | 0.115                       |
| 3B1C                          | 2.53                        | 2.1                         | 5.54                        | 1.63                        | 1.92                        | 7.24                        | 0.097                       |
| 5B1CB                         | 2.39                        | 1.95                        | 5.26                        | 1.41                        | 1.76                        | 6.32                        | 0.073                       |
| 0.5B3C                        | 2.62                        | 2.36                        | 5.84                        | 1.77                        | 2.29                        | 9.45                        | 0.11                        |
| 1B3C                          | 2.31                        | 2.11                        | 5.5                         | 1.48                        | 1.94                        | 7.33                        | 0.092                       |
| 3B3C                          | 2.11                        | 1.85                        | 5.17                        | 1.31                        | 1.7                         | 6.21                        | 0.065                       |
| 5B3C                          | 1.92                        | 1.64                        | 4.86                        | 1.02                        | 1.42                        | 5.19                        | 0.054                       |
| 0.5B5C                        | 2.34                        | 2.17                        | 5.42                        | 1.51                        | 1.79                        | 6.74                        | 0.087                       |
| 1B5C                          | 1.95                        | 1.78                        | 5.1                         | 1.06                        | 1.53                        | 5.22                        | 0.063                       |
| 3B5C                          | 1.56                        | 1.61                        | 4.69                        | 0.82                        | 1.17                        | 4.16                        | 0.042                       |
| 5B5C                          | 1.32                        | 1.48                        | 4.2                         | 0.66                        | 0.88                        | 3.34                        | 0.02                        |
| Control                       | 3.76                        | 3.13                        | 7.68                        | 2.65                        | 3.31                        | 28.26                       | 0.2                         |
